# 1 **Will climate change affect sugar beet establishment of the 21<sup>st</sup> century?**

## 2 **Insights from a simulation study using a crop emergence model**

3 Jay Ram Lamichhane<sup>1\*</sup>, Julie Constantin<sup>1</sup>, Jean-Noël Aubertot<sup>1</sup>, Carolyne Dürr<sup>2</sup>

4 <sup>1</sup>INRA, Université Fédérale de Toulouse, UMR 1248 AGIR, F-31326 Castanet-Tolosan,

5 France

6 <sup>2</sup>INRA, IRHS 1345, 42 rue George Morel, F-49071 Beaucozéz, France

7 \*Corresponding author: [jay-ram.lamichhane@inra.fr](mailto:jay-ram.lamichhane@inra.fr)

8 Tel: +33 (0)5 61 28 52 50; Fax: +33 (0)5 61 28 55 37

### 9 **Abstract**

10 Ongoing climate change has been reported to have far-reaching impact on crop  
11 development and yield in many regions of the globe including Europe. However, little is  
12 known about the potential impact of climate change on specific stages of the crop cycle  
13 including crop establishment, although it is a crucial stage of the annual crop cycles. For  
14 the first time, we performed a simulation study to pinpoint how sugar beet sowing  
15 conditions of the next eight decades will be altered under future climate change and if  
16 these variations will affect sowing dates, germination and emergence as well as bolting  
17 rates of this crop. We chose Northern France as an important study site, representative of  
18 sugar beet growing basin in Northern Europe. Sugar beet emergence simulations were  
19 performed for a period between 2020 and 2100, taking into account five sowing dates  
20 (mid-February, 1<sup>st</sup> March, mid-March, 1<sup>st</sup> April and mid-April). Soil water contents and  
21 temperatures in the 0-10 cm soil horizon were first simulated with the STICS soil-crop  
22 model using the most pessimistic IPCC scenario (RCP 8.5) to feed the SIMPLE crop  
23 emergence model. We also evaluated the probability of field access for the earlier sowings,

24 based on the amount of cumulated rainfall during February and March. When analyzed  
25 by sowing date and for successive 20-year period from 2020 to 2100, there was a  
26 significant increase in seedbed temperatures by 2°C after 2060 while no change in  
27 cumulative rainfall was found before and after sowings, compared with the past.  
28 Emergence rate was generally higher for 2081-2100, while time to reach the maximum  
29 emergence rate decreased by about one week, compared with other periods, due to higher  
30 average seedbed temperatures. The rate of non-germinated seeds decreased, especially  
31 for the earlier sowing dates, but the frequency of non-emergence due to water stress  
32 increased after 2060 for all sowing dates, including the mid-February sowing. Bolting  
33 remains a risk for sowings before mid-March although this risk will be markedly  
34 decreased after 2060. The changes in seedbed conditions will be significant after 2060 in  
35 terms of temperatures. However, the possibility of field access will be a main limiting  
36 factor for earlier sowings, as no significant changes in cumulative rainfall, compared with  
37 the past, will occur under future climate change. When field access is not a constraint, an  
38 anticipation of the sowing date, compared to the currently practiced sowing (i.e. mid-  
39 March), will lead to decreased risks for the sugar beet crop establishment and bolting. The  
40 use of future climate scenarios coupled with a crop model allows a precise insight into the  
41 future sowing conditions, and provide helpful information to better project future farming  
42 systems.

43 **Key words:** adaptation, seed germination, seedling emergence, seedling mortality, soil-  
44 surface crust, temperature, water stress

## 45 **1. Introduction**

46 Seed germination and seedling emergence are critical phases of a crop cycle that affect  
47 the success or failure of any crop establishment (Villalobos et al. 2016). These early

48 phases of crop cycle are affected by several biotic and abiotic factors that may reduce seed  
49 germination and seedling emergence rates (Lamichhane et al. 2018). More specifically to  
50 abiotic stresses, many factors including seedbed water content, temperature, and the  
51 frequency and quantity of cumulated rainfall profoundly impact crop establishment  
52 (Gallardo-Carrera et al. 2007; Constantin et al. 2015; Dürr et al. 2016). Several studies  
53 reported that climate change will result in increased mean temperature and higher  
54 precipitation variability in many regions of the globe including Europe (Pendergrass et al.  
55 2017; Kjellström et al. 2018). The effects of ongoing climate change on crop yield have  
56 been extensively studied (Lobell et al. 2008; Challinor et al. 2014). For instance, climate  
57 change from 1980 to 2008 has resulted in reduced global production of maize by 3.8%  
58 and wheat by 5.5% compared with a counterfactual without climate change (Lobell et al.  
59 2008). A recent meta-analysis (Challinor et al. 2014) -- based on 1,700 published  
60 simulation studies on climate change impacts on yields and adaptation -- showed that  
61 without adaptation, there will be losses in production for wheat, rice and maize in both  
62 temperate and tropical regions by 2 °C of local warming.

63 While many studies assessed the impact of climate change on crop yields, there is less  
64 detailed information about the potential effect of climate change on crop establishment,  
65 although it is a crucial stage for annual crops. This prevents stakeholders from mobilizing  
66 adaptation strategies that may be helpful to attenuate climate change effects. Rather small  
67 adjustments (e.g. changes in varieties, sowing date and density, tillage or tactical pest  
68 management) in contrast to more systemic changes (e.g. changes in crop sequences;  
69 moving from dryland to irrigated systems or from spring to autumn sowings), may ensure  
70 successful crop establishment with positive impacts on crop yield (reviewed by  
71 Lamichhane et al. 2018). Indeed, either a lack or an excess of soil temperature, water  
72 content or rainfall may be detrimental to crop establishment. For example, if no

73 precipitation occurs after sowing the seed imbibition process is hindered and seeds  
74 cannot germinate. In contrast, if heavy rainfall occurs following sowing soil crusting will  
75 occur preventing seedlings from being emerged (Gallardo-Carrera et al. 2007). Spring  
76 crops are more sensitive to seedbed sowing conditions than winter crops. The risk of poor  
77 crop establishment is higher for these crops also because most of them are not able to  
78 compensate a lower plant density via tillering or ramification during their development.

79 Sugar beet (*Beta vulgaris* L.) is a typical example of spring crop highly sensitive to seedbed  
80 sowing conditions. In Northern Europe, these conditions are frequently unfavorable, with  
81 low temperatures, heavy rainfall followed by dry periods leading to soil surface crusting  
82 on loamy soils (Durr and Boiffin 1995). Sugar beet growers have to optimize sowing dates  
83 and seedbed preparations to ensure successful crop establishment. In addition, sugar beet  
84 is subject to bolting, if cold temperatures occur following early sowings (Longden et al.  
85 1975; Milford et al. 2010), with negative impact on its yield and volunteer plant's control.

86 Simulation studies are useful to help decision-making process. Exploration of adaptation  
87 strategies to climate change using process-based models allows crop-level evaluation and  
88 adaptation of existing cropping systems (Challinor et al. 2014). While numerous crop  
89 models have been developed and used to facilitate decision-making during the crop  
90 development phase, only few models focus on the crop establishment phase.

91 The objective of this simulation study was to pinpoint whether sowing conditions of the  
92 next decades (2020-2100) will be altered under climate change and if these variations  
93 will affect germination and emergence, as well as bolting rates of sugar beet in Northern  
94 Europe. A total of 405 sugar beet emergence simulations were performed taking into  
95 account five sowing dates. To this aim, we first mobilized the STICS soil-crop model  
96 (Brisson et al. 1998, 2003) to generate soil water content and temperature in the seedbed

97 (0–10 cm) using the most pessimistic IPCC scenario. We then used the data obtained as  
98 input variables to feed the SIMPLE crop emergence model (Dürr et al. 2001; Constantin et  
99 al. 2015). The emergence courses and final rates, and causes of no-seedling emergence  
100 are analyzed and discussed. In addition, the possibility of field access was evaluated  
101 comparing historical records in relation to future climatic conditions.

## 102 **2. Materials and methods**

### 103 **2.1. Description of the SIMPLE crop emergence model**

104 A comprehensive description including the functioning of the SIMPLE model and the list  
105 of equations and input variables has been previously provided (Dürr et al. 2001). Briefly,  
106 the model predicts the germination and emergence process and their final rates in  
107 relation to environmental conditions during sowing. The model has previously been  
108 parameterized for a number of crop species -- including wheat, sugar beet, flax, mustard,  
109 French bean, oilseed rape (Dürr et al. 2001; Dorsainvil et al. 2005; Moreau-Valancogne et  
110 al. 2008 ; Dürr et al. 2016), and a plant model *Medicago truncatula* (Brunel et al. 2009) -  
111 which allows to compare a range of plant species using the same set of parameters  
112 (Gardarin et al. 2016).

113 SIMPLE creates 3D representations of seedbeds with sowing depth distribution and the  
114 size, number, and position of soil aggregates as input variables. Daily soil temperature and  
115 soil water potential in several layers are also used as input variables for simulations, along  
116 with plant characteristics for germination and seedling growth. The model predicts  
117 germination and emergence, seed by seed, at daily intervals. The time required for  
118 germination of the seed  $i$  is chosen at random in the distribution of thermal times that  
119 characterizes the seed lot used. Cumulative thermal time from sowing is calculated above  
120 the base temperature ( $T_b$ ) for germination, provided that the soil water content at the

121 seed sowing depth is above the base water potential ( $\Psi_b$ ). The  $T_b$  and  $\Psi_b$  thresholds for  
122 germination are input variables. If seed  $i$  has not germinated after a given time (usually  
123 fixed at 30 days for the simulation), the model considers that the seed will never  
124 germinate. If the seed germinates, then a seedling grows from the seed. Time is expressed  
125 as thermal time using the  $T_b$  value. To better include the effect of early water stress on  
126 seedling growth, we added a water stress function to the SIMPLE model, which reduces  
127 emergence after germination (Constantin et al. 2015). With this function, the fate of  
128 seedlings is determined by considering soil water potential in the soil layer in which the  
129 radicle grows in the two days following germination. During this period, if soil water  
130 potential is lower than  $\Psi_b$ , the seedling does not emerge and dies the following day. If this  
131 is not the case, the time it takes for the seedling to reach the soil surface after germination  
132 is calculated by SIMPLE based on the seed's sowing depth, the length of the pathway the  
133 shoot takes through the aggregates, and the shoot's elongation function, whose  
134 parameters are input variables. The probability of the seedlings remaining blocked under  
135 aggregates depends on the size and position of the clods in the seedbed, i.e. laying on the  
136 surface or below it. Soil surface crusting depends on cumulative rainfall after sowing; a  
137 proportion of seedlings remain blocked under the crust depending on daily crust water  
138 content (no seedlings are blocked if the crust is wet). Simulations at the individual seed  
139 level are run 1000 times to predict the emergence rate and final emergence percentage.  
140 The causes of non-emergence simulated by SIMPLE are (i) non-germination, (ii) death of  
141 seedlings caused by water stress after germination and (iii) mechanical obstacles (clods  
142 or a soil crust). The SIMPLE model does not consider biotic stresses, such as pests and  
143 diseases or the effect of high temperatures, which could inhibit germination or cause  
144 young seedling death.

145 Bolting risk is represented by a function that was not initially presented in the seminal  
146 paper describing the SIMPLE model (Dürr et al, 2001). This function was derived from  
147 Longden et al (1975) and the probability of bolting  $\mu_b$  is calculated as:

$$148 \quad \mu_b = c_1 \left( 1 - e^{-c_2 n_{ccd}^{c_3}} \right) \quad \text{Equation 1}$$

149 where  $c_1$ ,  $c_2$ ,  $c_3$  dimensionless coefficients (Table 1);  $n_{ccd}$  is the number of cumulative cold  
150 days from sowing to the end of June and is calculated as follows:

$$151 \quad n_{ccd} = \sum_{i=1}^{i=i_{max}} \delta_{\alpha_i \beta_i} \quad \text{Equation 2}$$

152 where  $i$  is a daily index ranging from 1 (sowing day) to  $i_{max}$  (day corresponding to the end  
153 of June) and  $\delta_{\alpha_i \beta_i}$  is the Kronecker symbol with:

$$154 \quad \alpha_i = \beta_i \text{ if } \theta_i < \theta_b \text{ and } \alpha_i \neq \beta_i \text{ otherwise} \quad \text{Equation 3}$$

155 where  $\theta_i$  is the maximum daily temperature at 2 m, and  $\theta_b$  is the maximum threshold air  
156 temperature to define whether a given day is considered as cold or not with regard to  
157 bolting (**Table 1**).

158 More recent studies (Fauchère et al 2003; Milford 2010) suggested that devernization  
159 can occur if plants are exposed to high temperatures during a specific period of the crop  
160 cycle. Based on this information, we analyzed the number of days with  $T_{max} > 25^\circ\text{C}$   
161 between 60 to 120 days post sowing (dps). Finally, we established that if this number was  
162  $>7$ , the potential risk of having bolted plants became zero.

## 163 **2.2. Climate scenarios and simulations of the seedbed climate**

164 We used the RCP 8.5 emission scenario to generate soil temperature and water content of  
165 the seedbed using the STICS soil-crop model (Brisson et al. 2003). This model daily  
166 simulates soil water contents and temperatures, according to daily weather and soil

167 characteristics. Variations in soil moisture were predicted using STICS at 0-2, 2-4, 4-6 and  
168 6-10 cm. We selected Estrées-Mons (49°52'44"N 3°00'27"E), located in the typical sugar  
169 beet growing regions of Northern France, as study site. We chose Northern France as  
170 representative sugar beet growing basin of Northern Europe. The soil type considered  
171 had the following soil granulometry and chemical characteristics at the 0-30 cm soil  
172 horizon: 0.197 g.g<sup>-1</sup> clay, 0.747 g.g<sup>-1</sup> silt and 0.056 g.g<sup>-1</sup> sand; 0 g.g<sup>-1</sup> CaCO<sub>3</sub>, 0.095 g.g<sup>-1</sup> C,  
173 0.001 g.g<sup>-1</sup>N, C/N ratio 9.3, and pH 7.7.

174 Four weather and soil parameters were analyzed for the year 2020-2100: average soil  
175 temperature at sowing, average soil and maximum air temperature 30 dps, and cumulated  
176 rainfall 30 dps. The average weather data of the last 19 years (2000-2018) registered at  
177 the weather station of the study area were calculated to compare the trend with the  
178 simulated weather data of the next 81 years.

### 179 **2.3. Sugar beet sowing scenarios**

180 Values of plant input variables of SIMPLE for sugar beet crop are reported in **Table 1**. The  
181 seedbed considered in this study is typical of that prepared by growers and was  
182 characterized by 15-25% of soil aggregates >20mm in diameter and 70-85% of its  
183 aggregates having <20mm in diameter. The simulated sowing depths were 2.5 ± 0.4 cm.

184 A total of 405 sugar beet emergence simulations was performed for a period between  
185 2020 and 2100, taking into account five sowing dates: mid-February, 1<sup>st</sup> March, mid-  
186 March, 1<sup>st</sup> April, and mid-April. Farmers in Northern France most often practice mid-  
187 March sowing of sugar beet crop but we included both earlier (mid-February and 1<sup>st</sup>  
188 March) and late (1<sup>st</sup> April and mid-April) sowing dates taking into account a possible shift  
189 in future sowing dates due to climate change.



## 190 **2.4. Analysis of simulation results**

191 Climatic data were pooled and analyzed by sowing date and 20-year period (2000-2018  
192 for the past and 2020-2040, 2041-2060, 2061-2080, and 2081-2100 for the future). When  
193 data were analyzed by sowing date, the 100 years were treated as replicates. When data  
194 were analyzed by 20-year period, the 20 years x five sowing dates (i.e. 100) were treated  
195 as replicates. ANOVA was used to determine the potential effect of sowing dates and  
196 periods, and their interaction on the four average weather and soil parameters mentioned  
197 above.

198 The variability of germination and emergence rates and their duration was analyzed by  
199 establishing three classes of rate or duration, expressed as the frequency of each class  
200 over the 20-year period for germination and emergence rates, and their duration. For  
201 germination rate, thresholds were poor germination when germination rate was <75%  
202 and sufficient germination above 75%. For emergence rate, thresholds were poor  
203 emergence when the emergence rate was <50%, and sufficient over 50%. For germination  
204 duration, thresholds were low duration when the number of days required to reach  
205 maximum germination (NGmax) was < 14 days and high when NGmax was >14 days. For  
206 emergence duration, thresholds were low duration when the number of days required to  
207 reach maximum emergence (NEmax) was < 28 days, and high when NEmax was >28 days.  
208 The frequency of poor germination (<75%) and emergence (<50%) rates as well as high  
209 NGmax (>14 days) and NEmax (>28 days) duration were analyzed as they could lead to  
210 crop emergence failure and potential re-sowing.

211 The variability of causes of non-emergence was analyzed by establishing two classes of  
212 seed and seedling mortality rates for each mortality cause. For non-germination, the two  
213 classes were low with <25% and high with >25% non-germinating seeds. For seedling

214 mortality due to clod, crust and drought, the two classes were low with <15%, and high  
215 with >15% of seedling mortality. Frequency of high risks of non-germination (>25%) and  
216 seedling mortality due to clod, crust, and drought (each >15%) cases are presented for  
217 the same reason as described above.

218 The variability of bolting rates was presented as the average predicted percentages of  
219 bolted plants over the 20-year periods. This variability was also analyzed by establishing  
220 three classes of bolting rates : <0.5%, 0.5-1%, and >1% rate.

221 To determine significant effects on germination, emergence and bolting rates, and  
222 duration as well as on causes of non-emergence, in addition to the same statistical analysis  
223 performed for weather data (i.e. only by sowing date and 20-year period pooling all the  
224 data), we also analyzed the data by sowing date for each 20-year period separately  
225 (hereafter referred to as period). All statistical analyses were conducted using software R  
226 (Hothorn and Everitt 2009).

## 227 **2.5. Technical feasibility of sowing**

228 An earlier sowing than the currently practiced sowing (mid-March) may be possible  
229 under future climate change. This shift in sowing date however depends on field access  
230 for sowing. We determined whether farmers will have technical possibility for sowing for  
231 the simulated sowing dates and years using two following approaches.

232 i) based on a past historical data set (1987-2005), we observed a correlation between the  
233 quantity of total cumulative rainfall during the sowing in March and the percentage of  
234 sugar beet surface sown in France at the end of this month (**Figure 1**). We then compared  
235 these past observations with the predicted cumulative future rainfall of the same months  
236 (i.e. February and March).

237 ii) we supposed that >1 mm rainfall on sowing day will not technically allow field access  
238 for farmers for the sowings in February and March because the soil surface is wet and  
239 evapotranspiration low. Based on this, we calculated the frequency of days >1 mm rainfall  
240 for February and March.

## 241 **3. Results**

### 242 **3.1. Sowing conditions and their variability under future scenario**

243 When analyzed by sowing date, differences between the average soil temperature at  
244 sowing, average soil and maximum air temperature 30 dps were statistically significant  
245 ( $P < 0.001$ ) (**Table 2**). When analyzed by period of time, all average weather values  
246 related to temperature increased with time with statistically significant differences ( $P <$   
247  $0.001$ ). In contrast, no differences statistically significant were found for average rainfall  
248 30 dps ( $P = 0.220$ ).

249 As expected, average soil temperature at sowing increased with later sowing dates. The  
250 trend was similar for average soil and maximum air temperatures 30 dps. Overall, average  
251 soil temperature at sowing ranged between 5 °C for the mid-February sowing to 11 °C for  
252 the mid-April sowing, while average soil temperature 30 dps ranged from 6 °C for the mid-  
253 February sowing to 13 °C for the mid-April sowing. Also average maximum air  
254 temperature 30 dps was the lowest (9 °C) for the mid-February sowing while it was the  
255 highest (16 °C) for the mid-April sowing. In contrast to the three temperature factors,  
256 average rainfall 30 dps did not follow the same pattern: it was high (45-52 mm) for the  
257 first four sowing dates with no significant differences, and then decreased drastically for  
258 the mid-April sowing (28 mm).

259 When analyzed by period, average soil sowing day temperature was the lowest (7 °C) for  
260 the 2020-2040 and 2041-2060 periods, and increased progressively for the 2061-2080  
261 and 2081-2100 periods by 8 and 9 °C, respectively. The trend was the same also for  
262 average soil temperature 30 dps, which ranged from 9 °C for the 2020-2040 period to 11  
263 °C for the 2081-2100 period. These differences were significant between the first two and  
264 the last two periods. These changes became significant after 2060. In contrast, mean  
265 average maximum air temperature 30 dps varied over periods but with no regular  
266 increase. Mean cumulated rainfall 30 dps ranged from 39 to 47 mm, with a high variability  
267 between individual years, but without any significant differences until 2100. There was  
268 no significant effect of the sowing date x period interaction on any of the analyzed weather  
269 data (**Table 2**).

### 270 **3.2. Emergence rate, duration and frequency**

271 Year-to-year emergence rate variability for all five sowing dates is described in **Figure 2**.  
272 Results on the effect of sowing date for each period and their interaction on emergence  
273 rate, duration and frequency are reported in **Table 3**. Results on the effect of sowing date  
274 and period separately, and their interaction on emergence rate and duration are  
275 presented in **Supplementary Table 1**.

276 Year-to-year variability in emergence rate was very high for all sowing dates over the 81  
277 simulated years ranging from 0 to 85%. Emergence rate most often registered between  
278 50 and 85%, but emergence rate <50% were observed in many cases. Simulated average  
279 emergence rate by “sowing date × period” ranged from less than 50% for the mid-  
280 February sowing in 2020-2040 to more than 70% for different sowing dates. The  
281 frequency of poor emergence rate (<50%) ranged from 14 to 48% depending on sowing

282 date × period. The mid-February sowing in the 2020-2040 period not only had the lowest  
283 average emergence rate but also a high frequency of poor emergence rate.

284 When data were analyzed by sowing date for each period, the interaction effect of sowing  
285 date × period on emergence rate was not statistically significant ( $P = 0.08$ ). In contrast,  
286 the interaction effect was statistically significant ( $P < 0.001$ ) when all data were pooled  
287 and analyzed only by sowing date or period (**Supplementary Table 1**).

288 Simulated mean NEmax by sowing date × period ranged from 20 days for the mid-April  
289 sowing in the 2081-2100 period to 50 days for the mid-February sowing in the 2041-2060  
290 period (**Table 3**). Mean NEmax decreased over sowing dates and also over periods, by  
291 more than one week for the earlier sowing dates and to a lower extent for later sowings.  
292 Within each period, mean NEmax was almost no significantly different between the five  
293 sowing dates. However, there were statistically significant differences when the data were  
294 analyzed only by sowing date ( $P < 0.001$ ) or period ( $P < 0.001$ ; **Supplementary Table 1**).  
295 The frequency of high NEmax ( $>28$  days) ranged from 15 to 100% by sowing date ×  
296 period. This frequency was higher for earlier sowing dates and also for earlier periods  
297 (**Table 3**).

### 298 **3.4. Causes of non-emergence rates and frequencies**

299 Results on the main causes of non-emergence are reported in **Table 4**. The major causes  
300 of non-emergence were non-germination, followed by soil surface crusting and seedling  
301 death due to drought while seedling death due to clod was the least important. Results on  
302 the effect of sowing date for each period and their interactions on germination rate,  
303 duration and frequency are reported in **Table 5**. Outcomes on the overall effect of sowing  
304 date and period, and their interactions on germination rate and duration are presented in  
305 **Supplementary Table 1**.

### 306 **3.4.1. Non-germination**

307 The mean non-germination rate ranged from less than 5% for several sowing dates after  
308 the mid-March sowing to 37% for the mid-February sowing in the 2020-2040 period.  
309 When data were analyzed by sowing date for each period, and their interaction, no  
310 statistically significant effect of the sowing date, period, or their interaction was found on  
311 non-germination rate except between the 2020-2040 and 2081-2100 periods for the mid-  
312 February sowing. In contrast, non-germination rate differences were statistically  
313 significant when the data were combined and analyzed by sowing date ( $P < 0.001$ ), period  
314 ( $P < 0.01$ ), and their interaction ( $P < 0.001$ ; **Supplementary Table 2**). The frequency of  
315 high non-germination ( $>25\%$ ) ranged from 0 to 48% (**Figure 3**) depending on sowing  
316 date x period and was higher for earlier sowings.

317 Simulated average NGmax values ranged from 14 to 22 days when data were analyzed by  
318 sowing date for each period. These values generally decreased with later sowing dates  
319 and periods (**Table 5**). The frequency of high NGmax ( $>14$  days) ranged from 8 to 21%  
320 which generally decreased with later sowings and over the periods. No statistically  
321 significant effect of sowing date, period and their interaction ( $P = 0.98$ ) was found on  
322 mean NGmax values when data were analyzed by sowing date for each period. In contrast,  
323 when data were analyzed only by sowing date or period, there were statistically  
324 significant effects of sowing date ( $P < 0.001$ ) and period ( $P < 0.01$ ), but not of their  
325 interaction on mean NGmax (**Supplementary Table 1**).

### 326 **3.4.2. Seedling mortality due to crust**

327 Seedling mortality rate due to soil surface crust ranged from 6 to 15% (**Table 4**). Average  
328 mortality rate was generally lower for the 2020-2040 period until the mid-March sowing,  
329 as soil surface crust prevents emergence only when it becomes dry. No statistically

330 significant effect of sowing date ( $P = 0.48$ ) or period ( $P = 0.24$ ) or their interaction was  
331 observed on seedling mortality rate either when the data were analyzed by sowing date  
332 for each period ( $P = 0.76$ ) or only by sowing date and period ( $P = 0.22$ ) (**Supplementary**  
333 **Table 2**). The frequency of high seedling mortality rate ( $>15\%$ ) ranged from 19 to 45%  
334 (**Figure 3**). This frequency was lower for the 2020-2040 period until mid-March sowing.

### 335 **3.4.3. Seedling mortality due to drought**

336 Seedling mortality rate due to drought ranged from 1 to 14%, and increased with later  
337 sowing dates and periods, with some exceptions (**Table 4**). When data were analyzed by  
338 sowing date for each period, no significant effect of sowing date, period or their  
339 interaction ( $P = 0.276$ ) was found on seedling mortality rate. In contrast, when the data  
340 were pooled and analyzed only by sowing date and period, statistically significant effect  
341 of sowing date ( $P < 0.001$ ), period ( $P < 0.001$ ) and their interaction ( $P < 0.05$ ) was found  
342 on seedling mortality rate (**Supplementary Table 2**). The frequency of high mortality  
343 due to drought ( $>15\%$ ) ranged from 0 to 40% (**Figure 3**). This frequency increased with  
344 later sowing dates and periods. It is however remarkable that seedling mortality due to  
345 drought appeared for the 2081 – 2100 period even for sowings as early as mid-March or  
346 even before.

### 347 **3.4.4. Seedling mortality due to clod**

348 Seedling mortality rate due to clod ranged from 9 to 12% (**Table 4**) with little variability  
349 among the sowing dates or periods. This was expected because this mortality mostly  
350 depends on seedbed structure, which was the same for all simulations, independent of the  
351 sowing date and period.

### 352 **3.5. Risks of bolting**

353 When data were analyzed by sowing date for each 20-year period, significant effect of  
354 sowing date, period or their interaction ( $P < 0.001$ ) was found on potential bolting rate  
355 and devernialization conditions. The average predicted potential bolting rates ranged  
356 from 0.04% to 1.65%. As expected, bolting rates were higher for sowings in February and  
357 decreased with later sowing dates. Our results showed that the predicted bolting rates  
358 decreased progressively and significantly after 2060 for all simulated sowing dates  
359 **(Table 6)**. Likewise, the potential for devernialization highly increased due to an increased  
360 number of days with  $T_{max} > 25^{\circ}\text{C}$  at the end of spring **(Table 6)**. Based on these results,  
361 the average risk of bolting will be lower after 2060, even for the earliest sowing dates.

### 362 **3.6. Technical feasibility of sowing**

363 Results on the probability of field access for February and March over periods are  
364 reported in **Table 7**. When considering cumulated rainfall over one month or the number  
365 of days  $>1$  mm rainfall in February or March (i.e. the earliest sowing periods), there were  
366 no statistically significant differences between the two months and over the 20-year  
367 periods. This means that the technical feasibility of sowings will remain the same as  
368 nowadays, as shown in **Figure 1**.

## 369 **4. Discussion**

### 370 **4.1. Seedbed micro-climatic conditions under future scenarios**

371 We used the STICS soil-crop model based on the RCP 8.5 emission scenario to generate  
372 climate data. This model has been reported to be sensitive enough to generate realistic  
373 soil data such as soil moisture (Constantin et al. 2015; Dürr et al. 2016; Tribouillois et al.  
374 2018). Predictions of the STICS soil-crop model showed that during the sowing period of  
375 sugar beet, mean seedbed temperatures will increase over time and that a higher



376 variability of rainfall will occur, without an overall increase of its cumulated values. The  
377 trends we found here are coherent with those generally expressed for global climate  
378 changes, and the use of the STICS model allows to evaluate more precisely these changes  
379 specifically in the seedbed and for the sowing period of sugar beet in Northern France or  
380 Europe.

381 Under the most pessimistic climate scenario that we used, the predicted rise in mean soil  
382 temperature at sowing remained 0 °C until 2060 and became +2 °C after 2080. When  
383 climatic data of the next eight decades were compared with the past two decades, we  
384 found that average soil temperature 30 dps of the last 19 years were similar to those  
385 predicted until 2060, but higher over the last two periods. This highlights that the impact  
386 of climate change will become more remarkable after 2060 with warmer soil  
387 temperatures during the last two decades of the 21<sup>st</sup> century. Interestingly, when  
388 maximum air temperature at sowing was considered, mean values 30 dps showed a very  
389 high year-to-year variability, but without any regular increase over the years.

390 In contrast to predicted seedbed temperatures, cumulative rainfall did not change over  
391 time and were more or less the same for the first four sowing dates. A delay of two weeks  
392 in sowing from 1<sup>st</sup> to mid-April resulted in an increased drought risk under future climate  
393 change.

#### 394 **4.2. Sugar beet crop establishment under future climate**

395 Several previous studies compared results of field observation and simulation using the  
396 SIMPLE crop emergence model and found its prediction similar to observed data  
397 (Dorsainvil et al. 2005; Brunel-Muguet et al. 2011; Constantin et al. 2015; Dürr et al.  
398 2016). Therefore, prediction of germination and emergence rates reported in this study  
399 can be considered reliable. Even by using the most pessimistic climate scenario,

400 predictions based on the SIMPLE crop emergence model showed that, in most cases, there  
401 will be a sufficient level of sugar beet crop emergence in Northern France and Europe  
402 under future climate change.

403 Despite performing simulation studies using only one climate scenario, the results of this  
404 study represent an important outcome for decision making related to sugar beet sowing  
405 not only in Northern France, but in Northern Europe in general due to similar climatic  
406 conditions and sowing dates. The inclusion of the most pessimistic climate scenario for  
407 simulation did not render necessary the use of other less pessimistic climate scenarios  
408 (i.e. RCP 2.6, 4.5 and 6). This is because we did not find any dramatic changes in sugar  
409 beet emergence rate which would have been less impacted with simulation studies  
410 including less drastic future climate scenarios. Nevertheless, our results are based on only  
411 one study site which represents a limit and thus future studies taking into account several  
412 study sites over space could shed more light in this regard.

413 The most important finding of this study is that there are no important variability in terms  
414 of emergence rate among sowing dates, except for the earliest one for which emergence  
415 rate was predicted to be higher and less variable after 2060. Sowing date adaptation is,  
416 by far, the most frequently investigated climate change adaptation option (White et al.  
417 2011). Sugar beet farmers in France and Northern Europe, who currently practice the  
418 mid-March sowing, may thus anticipate sowing under future climate scenarios, given that  
419 earlier sowing provides higher yield benefits. This is due to a prolonged vegetation period  
420 and the higher amount of intercepted solar radiation, as it is the case for many field crops  
421 (Van Ittersum and Rabbinge 1997).

422 Bolting causes yield penalties in sugar beet, and contribute to gene flow, seed dispersion,  
423 and volunteer plant development in the next crops (Longden et al 1975; Sester et al 2008).

424 Therefore, bolting risks could be a limiting factor even when there are possibilities for  
425 earlier sowing. Our results showed that the predicted bolting risk will decrease over time  
426 and will become reduced for the mid-February sowing and very limited for the 1<sup>st</sup> March  
427 sowing, especially after 2060.

#### 428 **4.3. Causes of non-emergence of seedlings under future scenarios**

429 In terms of the total percentage of emergence failure, the one due to non-germination was  
430 the most important followed by soil surface crusting and drought. Seedling mortality rates  
431 under clod did not vary over sowing dates or periods since it strictly depends on the  
432 seedbed structure chosen for simulations. It is also the reason why the maximum  
433 simulated emergence rate remained always around 85%, due to about 5% non-  
434 germinating seeds in the simulated seed lot and about 10% non-emerging seedlings due  
435 to the simulated seedbed structure. Both germination and emergence were affected by  
436 the considered abiotic stresses. At the germination stage, very low temperature with  
437 earlier sowings, and very low or no rainfall during the later sowings affected the seed  
438 germination process. During the emergence phase, the frequency of emergence failure  
439 was either related to seedling mortality due to a soil surface crust with all sowing dates,  
440 or to water stress with later sowings. The average risk of crop emergence failure remains  
441 similar with sowing dates or periods but the prevalence of individual stress factor changes  
442 according to sowing dates and periods. After 2060 and to a greater extent after 2080,  
443 higher risks of seedling mortality due to drought appear even for the earliest sowing date.  
444 Such an analysis of non-emergence results can be obtained only with a simulation  
445 approach. Even in the current situation, field observations are rarely undertaken since  
446 they are difficult, time consuming and cannot be performed in a high number of fields.

447 Although the SIMPLE model does not consider the effect of high temperatures that could  
448 inhibit germination, we exclude the impact of this stress, given that all sowing were  
449 performed in spring and under North European conditions.

450 Seed germination and seedling emergence rates of sugar beet simulated by the SIMPLE  
451 crop emergence model could be overestimated because this model does not take into  
452 account the effect of biotic stresses (Constantin et al. 2015). Nevertheless, the risk related  
453 to biotic stress could be still limited under current cropping practices for two reasons.  
454 First, pelleting of sugar beet seeds containing protectants (fungicides, insecticides, and  
455 nematicides) and biostimulants -- is performed to date on 100% seeds (Agreste 2014)  
456 which may limit risks of the sugar beet crop establishment due to biotic stresses. Although  
457 several diseases of sugar beet caused by soil-borne pathogens, including *Rhizoctonia* root  
458 rot and damping-off, have been reported in Northern France (Motisi et al. 2009), the  
459 disease pressure is generally low when seeds are treated. Secondly, sugar beet crop is  
460 often rotated with other crops including wheat, to reduce pest inocula *sensu lato*, although  
461 some of the crops introduced into the rotation scheme may also be affected by the same  
462 soil-borne pathogens affecting sugar beet (Motisi et al. 2009). This is due to a wide host  
463 range of most soil-borne pathogens affecting the crop establishment phase (Lamichhane  
464 et al. 2017). Therefore, risks related to biotic stresses may be a limiting factor to sugar  
465 beet crop establishment under two conditions: i) when seeds are not treated with  
466 conventional pesticides and when farmers plan to anticipate sowing, especially under  
467 climate change. As shown in this study, an anticipation of sowing, compared to the  
468 currently practiced sowing (i.e. mid-March) may be beneficial in terms of yield, but it has  
469 to take into account potential risks due to biotic stresses. The latter is generally increased  
470 when crops are sown into cold and humid soil conditions and without chemical seed  
471 treatment (Serrano and Robertson 2018). Therefore, future studies should integrate the

472 biotic determinants affecting crop establishment into the SIMPLE crop emergence model  
473 since the sustainability of chemical pesticides in general and those used for seed  
474 treatment in particular is increasingly questioned, especially in the European Union for  
475 human health and environmental reasons (Lamichhane et al. 2016). This has led to the  
476 recent ban of neonicotinoids in the EU which were widely used for seed treatment (Gross  
477 2013).

#### 478 **4.4. Technical feasibility of sowing**

479 The feasibility of technical field operations depends on water content of the soil top layers  
480 and thus also on climate change and sowing dates. We evaluated the possibility to enter  
481 into the field with agricultural equipments including a seeder for each simulated sowing  
482 date and year, using past historical data on earlier sowing dates. Our results suggest that,  
483 field access will represent the main limit for earlier sowings in the future as rainfall during  
484 early spring will not decrease, compared with the past.

### 485 **5. Conclusions**

486 Climate impact studies are dominated by those on crop yields (Wollenberg et al. 2016).  
487 Little is known about the impact of changing climate on specific stages of the crop cycle,  
488 especially the crop establishment phase. To achieve an acceptable level of yield it is  
489 essential to optimize conditions that favor crop establishment. Despite several  
490 limitations, simulation studies represent an important means when it comes to predict  
491 food security of the 21<sup>st</sup> century under future climate change. The present study provides  
492 important information that was not possible without mobilizing simulation approach  
493 using process-based models. Despite some possibilities of crop emergence failure, the  
494 quality of crop establishment will be acceptable under future scenarios, which was not  
495 easy to predict without simulations. An anticipation of sowing, compared to the currently

496 practiced sowing (i.e. mid-March), will be viable under future climate change, with  
497 possibility of compensating increasing drought risks during summer. However, the  
498 possibility of field access will remain a limiting factor due to extremely variable and high  
499 cumulative rainfall values in late winter across our study sites.

## 500 **Acknowledgements**

501 This study was supported by a starter grant of the INRA's Environment and Agronomy  
502 Division to the first author. The authors thank the colleagues from technical institute of  
503 sugar beet (ITB) for useful discussion on this topic.

## 504 **References**

- 505 Agreste (2014) La protection des cultures. 21:49–64.
- 506 Brisson N, Gary C, Justes E, et al (2003) An overview of the crop model STICS. Eur J Agron  
507 18:309–332. doi: 10.1016/S1161-0301(02)00110-7
- 508 Brisson N, Mary B, Ripoche D, et al (1998) STICS: a generic model for the simulation of  
509 crops and their water and nitrogen balances. I. Theory and parameterization applied  
510 to wheat and corn. Agronomie. doi: 10.1051/agro:19980501
- 511 Brunel-Muguet S, Aubertot J-N, Durr C (2011) Simulating the impact of genetic diversity  
512 of *Medicago truncatula* on germination and emergence using a crop emergence  
513 model for ideotype breeding. Ann Bot. doi: 10.1093/aob/mcr071
- 514 Brunel S, Teulat-Merah B, Wagner M-H, et al (2009) Using a model-based framework for  
515 analysing genetic diversity during germination and heterotrophic growth of  
516 *Medicago truncatula*. Ann Bot 103:1103–1117. doi: 10.1093/aob/mcp040
- 517 Challinor AJ, Watson J, Lobell DB, et al (2014) A meta-analysis of crop yield under climate  
518 change and adaptation. Nat Clim Chang 4:287. doi: 10.1038/nclimate2153
- 519 Constantin J, Dürr C, Tribouillois H, Justes E (2015) Catch crop emergence success  
520 depends on weather and soil seedbed conditions in interaction with sowing date: A  
521 simulation study using the SIMPLE emergence model. F Crop Res 176:22–33. doi:  
522 10.1016/j.fcr.2015.02.017
- 523 Dorsainvil F, Durr C, Justes E, Carrera A (2005) Characterisation and modelling of white  
524 mustard (*Sinapis alba* L.) emergence under several sowing conditions. Eur J Agron  
525 23:146–158. doi: 10.1016/j.eja.2004.11.002
- 526 Dürr C, Aubertot JN, Richard G, et al (2001) SIMPLE: a model for SIMulation of PLant  
527 Emergence predicting the effects of soil tillage and sowing operations. Soil Sci Soc Am  
528 J 65:414–442. doi: 10.2136/sssaj2001.652414x

- 529 Dürr C, Boiffin J (1995) Sugarbeet seedling growth from germination to first leaf stage. *J*  
530 *Agric Sci* 124:427–435. doi: 10.1017/S002185960007338X
- 531 Dürr C, Constantin J, Wagner M-H, et al (2016) Virtual modeling based on deep  
532 phenotyping provides complementary data to field experiments to predict plant  
533 emergence in oilseed rape genotypes. *Eur J Agron* 79:90–99. doi:  
534 10.1016/j.eja.2016.06.001
- 535 Fauchère J, Richard-Molard M, Souverai, F, et al (2003). Cartographie des risques de  
536 montées en France en relation avec les températures de printemps et d'été –  
537 conséquences sur l'expérimentation et le conseil. In: Proceedings of the 1<sup>st</sup> Joint  
538 International Institut de Recherches sur la Betterave/American Society of Sugar Beet  
539 Technologists Conference, San Antonio, Texas, 2003, pp. 189–205. Brussels &  
540 Denver, CO: IIRB & ASSBT.
- 541 Gallardo-Carrera A, Léonard J, Duval Y, Dürr C (2007) Effects of seedbed structure and  
542 water content at sowing on the development of soil surface crusting under rainfall.  
543 *Soil Tillage Res* 95:207–217. doi: 10.1016/j.still.2007.01.001
- 544 Gardarin A, Coste F, Wagner M-H, Dürr C (2016) How do seed and seedling traits influence  
545 germination and emergence parameters in crop species? A comparative analysis.  
546 *Seed Sci Res* 26:317–331. doi: 10.1017/S0960258516000210
- 547 Gross M (2013) EU ban puts spotlight on complex effects of neonicotinoids. *Curr Biol*. doi:  
548 10.1016/j.cub.2013.05.030
- 549 Hothorn T, Everitt B (2009) *A Handbook of Statistical Analyses Using R*, Second Edition
- 550 Kjellström E, Nikulin G, Strandberg G, et al (2018) European climate change at global  
551 mean temperature increases of 1.5 and 2°C above pre-industrial conditions as  
552 simulated by the EURO-CORDEX regional climate models. *Earth Syst Dyn* 9:459–478.  
553 doi: 10.5194/esd-9-459-2018
- 554 Lamichhane JR, Dachbrodt-Saaydeh S, Kudsk P, Messéan A (2016) Toward a reduced  
555 reliance on conventional pesticides in European agriculture. *Plant Dis* 100:10-24.  
556 doi: 10.1094/PDIS-05-15-0574-FE
- 557 Lamichhane JR, Debaeke P, Steinberg C, et al (2018) Abiotic and biotic factors affecting  
558 crop seed germination and seedling emergence: a conceptual framework. *Plant Soil*  
559 432:1–28. doi: 10.1007/s11104-018-3780-9
- 560 Lamichhane JR, Dürr C, Schwanck AA, et al (2017) Integrated management of damping-  
561 off diseases. A review. *Agron Sustain Dev* 37:10. doi: 10.1007/s13593-017-0417-y
- 562 Lobell DB, Burke MB, Tebaldi C, et al (2008) Prioritizing Climate Change Adaptation Needs  
563 for Food Security in 2030. *Science* (80- ) 319:607-610. doi:  
564 10.1126/science.1152339
- 565 Longden P, Scott RK, Tyldesley JB (1975) Bolting of sugar beet grown in England. *Outlook*  
566 *Agric* 8:188–193. doi: 10.1177/003072707500800406
- 567 Milford GFJ, Jarvis PJ, Walters C (2010) A vernalization-intensity model to predict bolting  
568 in sugar beet. *J Agric Sci* 148:127–137. doi: 10.1017/S0021859609990323
- 569 Moreau-Valancogne P, Coste F, Crozat Y, Dürr C (2008) Assessing emergence of bean

- 570 (*Phaseolus vulgaris* L.) seed lots in France: Field observations and simulations. Eur J  
571 Agron 28:309–320. doi: 10.1016/j.eja.2007.09.003
- 572 Motisi N, Montfort F, Doré T, et al (2009) Duration of control of two soilborne pathogens  
573 following incorporation of above- and below-ground residues of *Brassica juncea* into  
574 soil. Plant Pathol. doi: 10.1111/j.1365-3059.2008.02017.x
- 575 Pendergrass AG, Knutti R, Lehner F, et al (2017) Precipitation variability increases in a  
576 warmer climate. Sci Rep 7:17966. doi: 10.1038/s41598-017-17966-y
- 577 Serrano M, Robertson AE (2018) The effect of cold stress on damping-off of soybean  
578 caused by *Pythium sylvaticum*. Plant Dis 102:2194–2200. doi: 10.1094/PDIS-12-17-  
579 1963-RE
- 580 Sester M, Tricault Y, Darmency H, et al (2008) GeneSys-Beet: A model of the effects of  
581 cropping systems on gene flow between sugar beet and weed beet. F Crop Res.  
582 107:245-256. doi: 10.1016/j.fcr.2008.02.011
- 583 Tribouillois H, Constantin J, Justes E (2018) Analysis and modeling of cover crop  
584 emergence: Accuracy of a static model and the dynamic STICS soil-crop model. Eur J  
585 Agron. 93:73-81. doi: 10.1016/j.eja.2017.12.004
- 586 Van Ittersum MK, Rabbinge R (1997) Concepts in production ecology for analysis and  
587 quantification of agricultural input-output combinations. F Crop Res. doi:  
588 10.1016/S0378-4290(97)00037-3
- 589 Villalobos FJ, Orgaz F, Fereres E (2016) Sowing and Planting. In: Villalobos FJ, Fereres E  
590 (eds) Principles of Agronomy for Sustainable Agriculture. Springer International  
591 Publishing, Cham, pp 217–227
- 592 Wallach D, Makowski D, Jones J, Brun F (2018). Working with Dynamic Crop Models.  
593 Methods, Tools and Examples for Agriculture and Environment. 3<sup>rd</sup> Edition Academic  
594 Press, p. 613.
- 595 White JW, Hoogenboom G, Kimball BA, Wall GW (2011) Methodologies for simulating  
596 impacts of climate change on crop production. F Crop Res. doi:  
597 10.1016/j.fcr.2011.07.001
- 598



**Table 1.** Values of the input variables of SIMPLE for sugar beet used in this study

| Parameter                                                                               | Value    | Unit                                |
|-----------------------------------------------------------------------------------------|----------|-------------------------------------|
| <b>Germination</b>                                                                      |          |                                     |
| Base temperature, $T_{b,germ}$                                                          | 3.5      | °C                                  |
| Germination percentages per thermal time class $STT_g$                                  |          | °Cd (%)                             |
| 20-25                                                                                   | 3        |                                     |
| 25-30                                                                                   | 12       |                                     |
| 30-35                                                                                   | 12       |                                     |
| 35-40                                                                                   | 32       |                                     |
| 40-45                                                                                   | 15       |                                     |
| 45-50                                                                                   | 15       |                                     |
| 50-55                                                                                   | 6        |                                     |
| 55-60                                                                                   | 1        |                                     |
| Residual percentage of non-germinated seeds                                             | 4        |                                     |
| Base water potential $\Psi_{b,germ}$                                                    | 1.94     | MPa                                 |
| <b>Heterotrophic growth</b>                                                             |          |                                     |
| Base temperature for elongation $T_{b,elon}$                                            | 3.5      | °C                                  |
| Parameters of the Weibull elongation function<br>(i) for hypocotyl                      |          |                                     |
| $a$                                                                                     | 59.06358 | mm                                  |
| $b$                                                                                     | 0.01696  | °C <sup>-1</sup> d <sup>-1</sup>    |
| $c$                                                                                     | 2.6095   |                                     |
| (ii) for radicle                                                                        |          |                                     |
| $v$                                                                                     | 0.7      | mm °C <sup>-1</sup> d <sup>-1</sup> |
| <b>Mechanical obstacles - clods</b>                                                     |          |                                     |
| Parameters of the probability function of seedling death under clod<br>(i) Buried clods |          |                                     |
| $\alpha_b$                                                                              | 0.031    | mm <sup>-1</sup>                    |

|                                                                                 |                  |                  |
|---------------------------------------------------------------------------------|------------------|------------------|
| $L_{ob}$                                                                        | 10.37            | mm               |
| ii) Clods laid on the soil surface                                              |                  |                  |
| $\alpha_{ss}$                                                                   | 0.021            | mm <sup>-1</sup> |
| $L_{oss}$                                                                       | 23.16            | mm               |
| <b>Mechanical obstacles - soil surface crust</b>                                |                  |                  |
| Probability ( $p$ ) for a seedling to emerge through a dry crust                | 60               | %                |
| Daily rain threshold causing the appearance of a crust                          | 5                | mm               |
| Cumulative rain-threshold causing the appearance of a crust                     | 12               | mm               |
| Daily rain threshold causing humidification of the crust during the last 3 days | 3.5              | mm               |
| <b>Parameters of the bolting function</b>                                       |                  |                  |
|                                                                                 | 1.407769         |                  |
| $c_1$                                                                           | 10 <sup>-1</sup> |                  |
|                                                                                 | 2.500000         |                  |
| $c_2$                                                                           | 10 <sup>-5</sup> |                  |
| $c_3$                                                                           | 2.197334         |                  |
| $\theta_b$ , threshold for the daily maximum air temperature at 2 m for bolting | 12               | °C               |

---

**Table 2.** Differences among weather data (means  $\pm$  standard deviation) of the study site when analyzed by sowing date, 20-year period and their interaction

| <b>Sowing date</b>          | <b>ASTS (°C)</b>        | <b>AST 30 dps (°C)</b>  | <b>ATairmax 30 dps (°C)</b> | <b>TR 30 dps (mm)</b>    |
|-----------------------------|-------------------------|-------------------------|-----------------------------|--------------------------|
| Mid-February                | 5 <sup>a</sup> $\pm$ 3  | 6 <sup>a</sup> $\pm$ 2  | 9 <sup>a</sup> $\pm$ 2      | 46 <sup>b</sup> $\pm$ 30 |
| 1 <sup>st</sup> March       | 7 <sup>b</sup> $\pm$ 3  | 8 <sup>b</sup> $\pm$ 2  | 11 <sup>b</sup> $\pm$ 2     | 45 <sup>b</sup> $\pm$ 28 |
| Mid-March                   | 7 <sup>b</sup> $\pm$ 3  | 9 <sup>c</sup> $\pm$ 2  | 12 <sup>c</sup> $\pm$ 2     | 49 <sup>b</sup> $\pm$ 27 |
| 1 <sup>st</sup> April       | 9 <sup>c</sup> $\pm$ 3  | 11 <sup>d</sup> $\pm$ 2 | 15 <sup>d</sup> $\pm$ 2     | 52 <sup>b</sup> $\pm$ 26 |
| Mid-April                   | 11 <sup>d</sup> $\pm$ 3 | 13 <sup>e</sup> $\pm$ 2 | 16 <sup>e</sup> $\pm$ 2     | 28 <sup>a</sup> $\pm$ 19 |
| Df                          | 4                       | 4                       | 4                           | 4                        |
| Significance level          | ***                     | ***                     | ***                         | ***                      |
| <b>Period</b>               |                         |                         |                             |                          |
| 2000-2018                   | 7 <sup>a</sup> $\pm$ 3  | 9 <sup>a</sup> $\pm$ 3  | 13 <sup>b</sup> $\pm$ 4     | 40 <sup>a</sup> $\pm$ 27 |
| 2020-2040                   | 7 <sup>a</sup> $\pm$ 4  | 9 <sup>a</sup> $\pm$ 3  | 12 <sup>a</sup> $\pm$ 3     | 43 <sup>a</sup> $\pm$ 21 |
| 2041-2060                   | 7 <sup>a</sup> $\pm$ 3  | 9 <sup>a</sup> $\pm$ 3  | 12 <sup>a</sup> $\pm$ 3     | 46 <sup>a</sup> $\pm$ 27 |
| 2061-2080                   | 8 <sup>b</sup> $\pm$ 3  | 10 <sup>b</sup> $\pm$ 3 | 13 <sup>b</sup> $\pm$ 3     | 39 <sup>a</sup> $\pm$ 27 |
| 2081-2100                   | 9 <sup>b</sup> $\pm$ 3  | 11 <sup>b</sup> $\pm$ 3 | 14 <sup>b</sup> $\pm$ 3     | 47 <sup>a</sup> $\pm$ 33 |
| Df                          | 4                       | 4                       | 4                           | 4                        |
| Significance level          | ***                     | ***                     | ***                         | NS                       |
| <b>Sowing date X Period</b> |                         |                         |                             |                          |
| Df                          | 12                      | 12                      | 12                          | 12                       |
| Significance level          | NS                      | NS                      | NS                          | NS                       |

Means followed by the same letter are not significantly different within the year or sowing date categories; \*\*\*P < 0.001; \*\*P < 0.01; \*P < 0.05  
 NS: not significant; dps: days post sowing; ASTS: average soil temperature at sowing; AST: average soil temperature; ATairmax: average daily maximum air temperature; TR: total cumulated rainfall

**Table 3.** Emergence rate and duration (means  $\pm$  standard deviation) and frequencies with <50% emergence rate and >28 days to reach the maximum emergence when analyzed by sowing date for each 20-year period and their interaction

| Sowing date           | Period    | Emergence (%)             | Frequency (%) of emergence rate <50% | NEmax (days)              | Frequency (%) of NEmax >28 days |
|-----------------------|-----------|---------------------------|--------------------------------------|---------------------------|---------------------------------|
| Mid-February          | 2020-2040 | 48 <sup>a</sup> $\pm$ 32  | 48                                   | 45 <sup>a</sup> $\pm$ 24  | 95                              |
|                       | 2041-2060 | 62 <sup>a</sup> $\pm$ 24  | 25                                   | 50 <sup>a</sup> $\pm$ 12  | 100                             |
|                       | 2061-2080 | 63 <sup>a</sup> $\pm$ 20  | 30                                   | 40 <sup>a</sup> $\pm$ 13  | 80                              |
|                       | 2081-2100 | 68 <sup>a</sup> $\pm$ 20  | 25                                   | 37 <sup>a</sup> $\pm$ 10  | 70                              |
| 1 <sup>st</sup> March | 2020-2040 | 66 <sup>a</sup> $\pm$ 20  | 24                                   | 43 <sup>b</sup> $\pm$ 13  | 90                              |
|                       | 2041-2060 | 59 <sup>a</sup> $\pm$ 28  | 30                                   | 40 <sup>ab</sup> $\pm$ 16 | 85                              |
|                       | 2061-2080 | 60 <sup>a</sup> $\pm$ 20  | 30                                   | 36 <sup>ab</sup> $\pm$ 11 | 65                              |
|                       | 2081-2100 | 67 <sup>a</sup> $\pm$ 19  | 30                                   | 32 <sup>a</sup> $\pm$ 12  | 60                              |
| Mid-March             | 2020-2040 | 73 <sup>a</sup> $\pm$ 16  | 24                                   | 38 <sup>a</sup> $\pm$ 11  | 81                              |
|                       | 2041-2060 | 64 <sup>a</sup> $\pm$ 21  | 35                                   | 35 <sup>a</sup> $\pm$ 11  | 75                              |
|                       | 2061-2080 | 62 <sup>a</sup> $\pm$ 23  | 30                                   | 29 <sup>a</sup> $\pm$ 11  | 70                              |
|                       | 2081-2100 | 68 <sup>a</sup> $\pm$ 20  | 35                                   | 29 <sup>a</sup> $\pm$ 10  | 65                              |
| 1 <sup>st</sup> April | 2020-2040 | 69 <sup>a</sup> $\pm$ 15  | 14                                   | 28 <sup>a</sup> $\pm$ 7   | 43                              |
|                       | 2041-2060 | 70 <sup>a</sup> $\pm$ 15  | 25                                   | 27 <sup>a</sup> $\pm$ 7   | 40                              |
|                       | 2061-2080 | 66 <sup>a</sup> $\pm$ 21  | 25                                   | 26 <sup>a</sup> $\pm$ 10  | 50                              |
|                       | 2081-2100 | 74 <sup>a</sup> $\pm$ 15  | 25                                   | 23 <sup>a</sup> $\pm$ 8   | 30                              |
| Mid-April             | 2020-2040 | 74 <sup>ab</sup> $\pm$ 14 | 33                                   | 23 <sup>a</sup> $\pm$ 7   | 33                              |

|                                 |                               |                      |    |                     |    |
|---------------------------------|-------------------------------|----------------------|----|---------------------|----|
|                                 | 2041-2060                     | 74 <sup>b</sup> ± 11 | 20 | 24 <sup>a</sup> ± 7 | 30 |
|                                 | 2061-2080                     | 66 <sup>a</sup> ± 16 | 60 | 22 <sup>a</sup> ± 7 | 20 |
|                                 | 2081-2100                     | 72 <sup>b</sup> ± 15 | 25 | 20 <sup>a</sup> ± 7 | 15 |
| <b>Sowing date X<br/>Period</b> | <b>Df</b>                     | 12                   |    | 12                  |    |
|                                 | <b>Significance<br/>level</b> | NS                   |    | NS                  |    |

---

Means followed by the same letter are not significantly different; number of days required to reach maximum emergence (NEmax); NS: not significant

**Table 4.** Rates of non-emergence causes (means  $\pm$  standard deviation) of seedlings as analyzed by sowing date for each 20-year period and their interaction

| Sowing date           | Period    | Non-Germination (%)       | Clod (%)                | Crust (%)                | Drought (%)             |
|-----------------------|-----------|---------------------------|-------------------------|--------------------------|-------------------------|
| Mid-February          | 2020-2040 | 37 <sup>b</sup> $\pm$ 39  | 9 <sup>a</sup> $\pm$ 5  | 7 <sup>a</sup> $\pm$ 10  | 1 <sup>a</sup> $\pm$ 3  |
|                       | 2041-2060 | 17 <sup>ab</sup> $\pm$ 27 | 11 <sup>a</sup> $\pm$ 4 | 11 <sup>a</sup> $\pm$ 13 | 1 <sup>a</sup> $\pm$ 2  |
|                       | 2061-2080 | 17 <sup>ab</sup> $\pm$ 22 | 11 <sup>a</sup> $\pm$ 3 | 9 <sup>a</sup> $\pm$ 13  | 1 <sup>a</sup> $\pm$ 1  |
|                       | 2081-2100 | 13 <sup>a</sup> $\pm$ 17  | 11 <sup>a</sup> $\pm$ 2 | 8 <sup>a</sup> $\pm$ 13  | 2 <sup>a</sup> $\pm$ 6  |
| 1 <sup>st</sup> March | 2020-2040 | 14 <sup>a</sup> $\pm$ 18  | 11 <sup>a</sup> $\pm$ 2 | 9 <sup>a</sup> $\pm$ 12  | 1 <sup>a</sup> $\pm$ 2  |
|                       | 2041-2060 | 21 <sup>a</sup> $\pm$ 32  | 10 <sup>a</sup> $\pm$ 4 | 10 <sup>a</sup> $\pm$ 12 | 1 <sup>a</sup> $\pm$ 1  |
|                       | 2061-2080 | 16 <sup>a</sup> $\pm$ 24  | 11 <sup>a</sup> $\pm$ 3 | 13 <sup>a</sup> $\pm$ 14 | 2 <sup>a</sup> $\pm$ 3  |
|                       | 2081-2100 | 12 <sup>a</sup> $\pm$ 19  | 11 <sup>a</sup> $\pm$ 2 | 10 <sup>a</sup> $\pm$ 13 | 4 <sup>a</sup> $\pm$ 12 |
| Mid-March             | 2020-2040 | 9 <sup>a</sup> $\pm$ 16   | 12 <sup>a</sup> $\pm$ 2 | 6 <sup>a</sup> $\pm$ 10  | 1 <sup>a</sup> $\pm$ 4  |
|                       | 2041-2060 | 11 <sup>a</sup> $\pm$ 18  | 12 <sup>a</sup> $\pm$ 3 | 13 <sup>a</sup> $\pm$ 14 | 1 <sup>a</sup> $\pm$ 2  |
|                       | 2061-2080 | 17 <sup>a</sup> $\pm$ 28  | 11 <sup>a</sup> $\pm$ 4 | 10 <sup>a</sup> $\pm$ 12 | 3 <sup>a</sup> $\pm$ 6  |
|                       | 2081-2100 | 9 <sup>a</sup> $\pm$ 14   | 12 <sup>a</sup> $\pm$ 2 | 12 <sup>a</sup> $\pm$ 14 | 7 <sup>a</sup> $\pm$ 15 |
| 1 <sup>st</sup> April | 2020-2040 | 5 <sup>a</sup> $\pm$ 7    | 12 <sup>a</sup> $\pm$ 1 | 13 <sup>a</sup> $\pm$ 12 | 2 <sup>a</sup> $\pm$ 5  |
|                       | 2041-2060 | 7 <sup>a</sup> $\pm$ 10   | 12 <sup>a</sup> $\pm$ 2 | 11 <sup>a</sup> $\pm$ 13 | 4 <sup>a</sup> $\pm$ 10 |
|                       | 2061-2080 | 11 <sup>a</sup> $\pm$ 22  | 11 <sup>a</sup> $\pm$ 3 | 11 <sup>a</sup> $\pm$ 12 | 5 <sup>a</sup> $\pm$ 12 |
|                       | 2081-2100 | 6 <sup>a</sup> $\pm$ 8    | 12 <sup>a</sup> $\pm$ 1 | 9 <sup>a</sup> $\pm$ 12  | 9 <sup>a</sup> $\pm$ 14 |
| Mid-April             | 2020-2040 | 4 <sup>a</sup> $\pm$ 1    | 12 <sup>a</sup> $\pm$ 1 | 10 <sup>a</sup> $\pm$ 13 | 7 <sup>a</sup> $\pm$ 11 |
|                       | 2041-2060 | 5 <sup>a</sup> $\pm$ 4    | 12 <sup>a</sup> $\pm$ 1 | 9 <sup>a</sup> $\pm$ 9   | 5 <sup>a</sup> $\pm$ 11 |

|                    |                           |                     |                     |                      |                      |
|--------------------|---------------------------|---------------------|---------------------|----------------------|----------------------|
|                    | 2061-2080                 | 8 <sup>a</sup> ± 11 | 12 <sup>a</sup> ± 2 | 15 <sup>a</sup> ± 14 | 14 <sup>a</sup> ± 19 |
|                    | 2081-2100                 | 6 <sup>a</sup> ± 8  | 12 <sup>a</sup> ± 1 | 10 <sup>a</sup> ± 12 | 6 <sup>a</sup> ± 14  |
| <b>Sowing date</b> | <b>Df</b>                 | 12                  | 12                  | 12                   | 12                   |
| <b>X Period</b>    | <b>Significance level</b> | NS                  | NS                  | NS                   | NS                   |

Means followed by the same letter are not significantly different within the sowing date categories; NS: not significant

**Table 5.** Germination rate and duration (means  $\pm$  standard deviation) and frequencies with <75% germination rate and >14 days to reach the maximum germination when analyzed by sowing date for each 20-year period and their interaction

| Sowing date           | Period    | Germination (%)           | Frequency (%) of germination rate <75% | NGmax (days)             | Frequency (%) of NGmax >14days |
|-----------------------|-----------|---------------------------|----------------------------------------|--------------------------|--------------------------------|
| Mid-February          | 2020-2040 | 63 <sup>a</sup> $\pm$ 39  | 48                                     | 21 <sup>a</sup> $\pm$ 10 | 21                             |
|                       | 2041-2060 | 83 <sup>ab</sup> $\pm$ 27 | 15                                     | 22 <sup>a</sup> $\pm$ 5  | 20                             |
|                       | 2061-2080 | 83 <sup>ab</sup> $\pm$ 22 | 25                                     | 20 <sup>a</sup> $\pm$ 6  | 15                             |
|                       | 2081-2100 | 87 <sup>b</sup> $\pm$ 17  | 20                                     | 18 <sup>a</sup> $\pm$ 7  | 13                             |
| 1 <sup>st</sup> March | 2020-2040 | 86 <sup>a</sup> $\pm$ 18  | 14                                     | 22 <sup>a</sup> $\pm$ 7  | 17                             |
|                       | 2041-2060 | 79 <sup>a</sup> $\pm$ 32  | 25                                     | 20 <sup>a</sup> $\pm$ 8  | 16                             |
|                       | 2061-2080 | 84 <sup>a</sup> $\pm$ 24  | 25                                     | 20 <sup>a</sup> $\pm$ 8  | 13                             |
|                       | 2081-2100 | 88 <sup>a</sup> $\pm$ 19  | 15                                     | 18 <sup>a</sup> $\pm$ 8  | 14                             |
| Mid-March             | 2020-2040 | 91 <sup>a</sup> $\pm$ 16  | 10                                     | 22 <sup>a</sup> $\pm$ 7  | 18                             |
|                       | 2041-2060 | 89 <sup>a</sup> $\pm$ 18  | 10                                     | 21 <sup>a</sup> $\pm$ 7  | 16                             |
|                       | 2061-2080 | 83 <sup>a</sup> $\pm$ 28  | 20                                     | 19 <sup>a</sup> $\pm$ 9  | 16                             |
|                       | 2081-2100 | 91 <sup>a</sup> $\pm$ 14  | 10                                     | 19 <sup>a</sup> $\pm$ 8  | 13                             |
| 1 <sup>st</sup> April | 2020-2040 | 95 <sup>a</sup> $\pm$ 7   | 5                                      | 17 <sup>a</sup> $\pm$ 6  | 14                             |
|                       | 2041-2060 | 93 <sup>a</sup> $\pm$ 10  | 5                                      | 16 <sup>a</sup> $\pm$ 5  | 13                             |
|                       | 2061-2080 | 89 <sup>a</sup> $\pm$ 22  | 15                                     | 18 <sup>a</sup> $\pm$ 8  | 14                             |
|                       | 2081-2100 | 94 <sup>a</sup> $\pm$ 8   | 5                                      | 16 <sup>a</sup> $\pm$ 7  | 11                             |



|                             |                           |                      |    |                     |    |
|-----------------------------|---------------------------|----------------------|----|---------------------|----|
| Mid-April                   | 2020-2040                 | 96 <sup>a</sup> ± 1  | 0  | 15 <sup>a</sup> ± 8 | 11 |
|                             | 2041-2060                 | 95 <sup>a</sup> ± 4  | 0  | 17 <sup>a</sup> ± 7 | 12 |
|                             | 2061-2080                 | 92 <sup>a</sup> ± 11 | 10 | 15 <sup>a</sup> ± 7 | 10 |
|                             | 2081-2100                 | 94 <sup>a</sup> ± 8  | 5  | 14 <sup>a</sup> ± 7 | 8  |
| <b>Sowing date X Period</b> | <b>Df</b>                 | 12                   |    | 12                  |    |
|                             | <b>Significance level</b> | NS                   |    | NS                  |    |

Means followed by the same letter are not significantly different; number of days required to reach maximum germination (NGmax); NS: not significant

**Table 6.** Bolting rate (means  $\pm$  standard deviation), without the devernalization effect, and frequency when analyzed by sowing date for each 20-year period and their interaction and potential devernalization due to high temperatures (7 days with  $T_{max} > 25^{\circ}\text{C}$ ) 60 to 120 days after sowing.

| Sowing date           | Year categories | Potential bolting rate (%)    | Frequency of potential bolting rates (%) |        |     | Number of days with $T_{max} > 25^{\circ}\text{C}$ , 60-120 days after sowing |
|-----------------------|-----------------|-------------------------------|------------------------------------------|--------|-----|-------------------------------------------------------------------------------|
|                       |                 |                               | <0.5%                                    | 0.5-1% | >1% |                                                                               |
| Mid-February          | 2020-2040       | 1.65 <sup>b</sup> $\pm$ 0.59  | 0                                        | 3      | 18  | 3 <sup>a</sup> $\pm$ 3                                                        |
|                       | 2041-2060       | 1.60 <sup>b</sup> $\pm$ 0.76  | 2                                        | 2      | 16  | 4 <sup>ab</sup> $\pm$ 6                                                       |
|                       | 2061-2080       | 0.97 <sup>a</sup> $\pm$ 0.41  | 4                                        | 5      | 11  | 7 <sup>ab</sup> $\pm$ 4                                                       |
|                       | 2081-2100       | 0.79 <sup>a</sup> $\pm$ 0.54  | 7                                        | 8      | 5   | 8 <sup>b</sup> $\pm$ 7                                                        |
| 1 <sup>st</sup> March | 2020-2040       | 0.89 <sup>b</sup> $\pm$ 0.38  | 3                                        | 9      | 9   | 4 <sup>a</sup> $\pm$ 4                                                        |
|                       | 2041-2060       | 0.88 <sup>b</sup> $\pm$ 0.52  | 5                                        | 7      | 8   | 7 <sup>ab</sup> $\pm$ 7                                                       |
|                       | 2061-2080       | 0.47 <sup>a</sup> $\pm$ 0.26  | 12                                       | 8      | 0   | 13 <sup>bc</sup> $\pm$ 7                                                      |
|                       | 2081-2100       | 0.40 <sup>a</sup> $\pm$ 0.33  | 13                                       | 6      | 1   | 15 <sup>c</sup> $\pm$ 9                                                       |
| Mid-March             | 2020-2040       | 0.40 <sup>b</sup> $\pm$ 0.21  | 16                                       | 5      | 0   | 6 <sup>a</sup> $\pm$ 6                                                        |
|                       | 2041-2060       | 0.40 <sup>b</sup> $\pm$ 0.28  | 13                                       | 6      | 1   | 13 <sup>ab</sup> $\pm$ 8                                                      |
|                       | 2061-2080       | 0.17 <sup>a</sup> $\pm$ 0.13  | 20                                       | 0      | 0   | 20 <sup>bc</sup> $\pm$ 10                                                     |
|                       | 2081-2100       | 0.16 <sup>a</sup> $\pm$ 0.17  | 19                                       | 1      | 0   | 23 <sup>c</sup> $\pm$ 12                                                      |
| 1 <sup>st</sup> April | 2020-2040       | 0.11 <sup>bc</sup> $\pm$ 0.08 | 21                                       | 0      | 0   | 8 <sup>a</sup> $\pm$ 8                                                        |

|                                   |                               |                           |    |   |   |                       |
|-----------------------------------|-------------------------------|---------------------------|----|---|---|-----------------------|
|                                   | 2041-2060                     | 0.13 <sup>c</sup> ± 0.14  | 19 | 1 | 0 | 17 <sup>ab</sup> ± 10 |
|                                   | 2061-2080                     | 0.04 <sup>ab</sup> ± 0.05 | 20 | 0 | 0 | 26 <sup>bc</sup> ± 12 |
|                                   | 2081-2100                     | 0.02 <sup>a</sup> ± 0.03  | 20 | 0 | 0 | 32 <sup>c</sup> ± 12  |
| Mid-April                         | 2020-2040                     | 0.02 <sup>ab</sup> ± 0.02 | 21 | 0 | 0 | 13 <sup>a</sup> ± 11  |
|                                   | 2041-2060                     | 0.03 <sup>b</sup> ± 0.04  | 20 | 0 | 0 | 26 <sup>b</sup> ± 12  |
|                                   | 2061-2080                     | 0.01 <sup>ab</sup> ± 0.01 | 20 | 0 | 0 | 33 <sup>bc</sup> ± 12 |
|                                   | 2081-2100                     | 0.00 <sup>a</sup> ± 0.01  | 20 | 0 | 0 | 42 <sup>c</sup> ± 11  |
| <b>Sowing dates X<br/>Periods</b> | <b>Df</b>                     | 12                        |    |   |   | 12                    |
|                                   | <b>Significance<br/>level</b> | ***                       |    |   |   | ***                   |

---

Means followed by the same letter are not significantly different within the sowing dates or periods; \*\*\*P < 0.001; \*\*P < 0.01; \*P < 0.05; NS: not significant

**Table 7.** Indicators for field accessibility for farmers to perform sowing for early sowing dates and periods

| Period of time                             | Period    | Average cumulated rainfall<br>30 days before sowing (mm) | Number of days with<br>>1mm |
|--------------------------------------------|-----------|----------------------------------------------------------|-----------------------------|
| 1 <sup>st</sup> February – end of February | 2000-2018 | 38 <sup>a</sup> ± 3                                      | 8 <sup>a</sup> ± 0.45       |
|                                            | 2020-2040 | 47 <sup>a</sup> ± 3                                      | 11 <sup>a</sup> ± 0.47      |
|                                            | 2041-2060 | 51 <sup>a</sup> ± 3                                      | 11 <sup>a</sup> ± 0.48      |
|                                            | 2061-2080 | 51 <sup>a</sup> ± 4                                      | 10 <sup>a</sup> ± 0.47      |
|                                            | 2081-2100 | 52 <sup>a</sup> ± 3                                      | 11 <sup>a</sup> ± 0.47      |
| 1 <sup>st</sup> March –end of March        | 2000-2018 | 45 <sup>a</sup> ± 3                                      | 8 <sup>a</sup> ± 0.43       |
|                                            | 2020-2040 | 48 <sup>a</sup> ± 3                                      | 10 <sup>a</sup> ± 0.45      |
|                                            | 2041-2060 | 50 <sup>a</sup> ± 3                                      | 9 <sup>a</sup> ± 0.44       |
|                                            | 2061-2080 | 37 <sup>a</sup> ± 3                                      | 7 <sup>a</sup> ± 0.42       |
|                                            | 2081-2100 | 50 <sup>a</sup> ± 4                                      | 9 <sup>a</sup> ± 0.45       |

Means followed by the same letter are not significantly different within the sowing dates or periods

**Supplementary Table 1.** Germination and emergence rates and duration of sugar beet (means  $\pm$  standard deviation) when analyzed by sowing date and 20-year period

| <b>Sowing date</b>          | <b>Germination (%)</b>    | <b>Emergence (%)</b>      | <b>NGmax (days)</b>      | <b>NEmax (days)</b>      |
|-----------------------------|---------------------------|---------------------------|--------------------------|--------------------------|
| Mid-February                | 79 <sup>a</sup> $\pm$ 29  | 59 <sup>a</sup> $\pm$ 25  | 17 <sup>a</sup> $\pm$ 7  | 26 <sup>b</sup> $\pm$ 8  |
| 1 <sup>st</sup> March       | 84 <sup>ab</sup> $\pm$ 23 | 61 <sup>a</sup> $\pm$ 22  | 20 <sup>b</sup> $\pm$ 7  | 38 <sup>d</sup> $\pm$ 14 |
| Mid-March                   | 89 <sup>bc</sup> $\pm$ 19 | 64 <sup>a</sup> $\pm$ 21  | 15 <sup>a</sup> $\pm$ 7  | 22 <sup>a</sup> $\pm$ 7  |
| 1 <sup>st</sup> April       | 93 <sup>c</sup> $\pm$ 13  | 64 <sup>a</sup> $\pm$ 20  | 20 <sup>b</sup> $\pm$ 7  | 43 <sup>e</sup> $\pm$ 16 |
| Mid-April                   | 94 <sup>c</sup> $\pm$ 7   | 63 <sup>a</sup> $\pm$ 20  | 20 <sup>b</sup> $\pm$ 8  | 33 <sup>c</sup> $\pm$ 11 |
| Df                          | 4                         | 4                         | 4                        | 4                        |
| Significance level          | ***                       | NS                        | ***                      | ***                      |
| <b>Period</b>               |                           |                           |                          |                          |
| 2020-2040                   | 86 <sup>a</sup> $\pm$ 23  | 63 <sup>ab</sup> $\pm$ 23 | 19 <sup>b</sup> $\pm$ 8  | 35 <sup>b</sup> $\pm$ 16 |
| 2041-2060                   | 88 <sup>a</sup> $\pm$ 21  | 63 <sup>ab</sup> $\pm$ 21 | 19 <sup>b</sup> $\pm$ 7  | 35 <sup>b</sup> $\pm$ 14 |
| 2061-2080                   | 86 <sup>a</sup> $\pm$ 22  | 58 <sup>a</sup> $\pm$ 22  | 18 <sup>ab</sup> $\pm$ 8 | 31 <sup>a</sup> $\pm$ 12 |
| 2081-2100                   | 91 <sup>a</sup> $\pm$ 14  | 64 <sup>b</sup> $\pm$ 21  | 17 <sup>a</sup> $\pm$ 7  | 29 <sup>a</sup> $\pm$ 11 |
| Df                          | 3                         | 3                         | 3                        | 3                        |
| Significance level          | NS                        | *                         | **                       | ***                      |
| <b>Sowing date X Period</b> |                           |                           |                          |                          |
| Df                          | 12                        | 12                        | 12                       | 12                       |
| Significance level          | ***                       | ***                       | NS                       | NS                       |

Means followed by the same letter are not significantly different within the year or sowing date categories; \*\*\*P < 0.001; \*\*P < 0.01; \*P < 0.05; NS: not significant; NGmax and NEmax: number of days required to reach the maximum germination and emergence respectively

**Supplementary Table 2.** Causes of non-emergence rates of sugar beet (means  $\pm$  standard deviation) when analyzed by sowing date and 20-year period

| <b>Sowing date</b>          | <b>Non-Germination (%)</b> | <b>Clod (%)</b>          | <b>Crust (%)</b>         | <b>Drought (%)</b>       |
|-----------------------------|----------------------------|--------------------------|--------------------------|--------------------------|
| Mid-February                | 7 <sup>a</sup> $\pm$ 13    | 10 <sup>a</sup> $\pm$ 4  | 9 <sup>a</sup> $\pm$ 12  | 2 <sup>a</sup> $\pm$ 4   |
| 1 <sup>st</sup> March       | 16 <sup>bc</sup> $\pm$ 23  | 11 <sup>ab</sup> $\pm$ 3 | 10 <sup>a</sup> $\pm$ 12 | 3 <sup>a</sup> $\pm$ 6   |
| Mid-March                   | 6 <sup>a</sup> $\pm$ 7     | 11 <sup>bc</sup> $\pm$ 3 | 10 <sup>a</sup> $\pm$ 12 | 4 <sup>ab</sup> $\pm$ 8  |
| 1 <sup>st</sup> April       | 21 <sup>c</sup> $\pm$ 29   | 12 <sup>c</sup> $\pm$ 2  | 11 <sup>a</sup> $\pm$ 12 | 6 <sup>bc</sup> $\pm$ 11 |
| Mid-April                   | 11 <sup>ab</sup> $\pm$ 19  | 12 <sup>c</sup> $\pm$ 1  | 11 <sup>a</sup> $\pm$ 12 | 9 <sup>c</sup> $\pm$ 14  |
| Df                          | 4                          | 4                        | 4                        | 4                        |
| Significance level          | ***                        | ***                      | NS                       | ***                      |
| <b>Period</b>               |                            |                          |                          |                          |
| 2020-2040                   | 14 <sup>a</sup> $\pm$ 23   | 11 <sup>a</sup> $\pm$ 3  | 9 <sup>a</sup> $\pm$ 12  | 3 <sup>a</sup> $\pm$ 7   |
| 2041-2060                   | 12 <sup>a</sup> $\pm$ 21   | 11 <sup>a</sup> $\pm$ 3  | 10 <sup>a</sup> $\pm$ 12 | 3 <sup>a</sup> $\pm$ 7   |
| 2061-2080                   | 14 <sup>a</sup> $\pm$ 22   | 11 <sup>a</sup> $\pm$ 3  | 11 <sup>a</sup> $\pm$ 13 | 6 <sup>b</sup> $\pm$ 12  |
| 2081-2100                   | 9 <sup>a</sup> $\pm$ 14    | 11 <sup>a</sup> $\pm$ 2  | 10 <sup>a</sup> $\pm$ 12 | 6 <sup>b</sup> $\pm$ 12  |
| Df                          | 3                          | 3                        | 3                        | 3                        |
| Significance level          | **                         | NS                       | NS                       | ***                      |
| <b>Sowing date X Period</b> |                            |                          |                          |                          |
| Df                          | 12                         | 12                       | 12                       | 12                       |
| Significance level          | ***                        | ***                      | NS                       | *                        |

Means followed by the same letter are not significantly different within the year or sowing date categories; \*\*\*P < 0.001; \*\*P < 0.01; \*P < 0.05; NS: not significant

**Figure 1.** Relationship between cumulative rainfall (measured at Estrées-Mons ; 49°52'44"N 3°00'27"E) and percentage of sown surface recorded at the end of March across the sugar beet growing area in France (1987-2005).

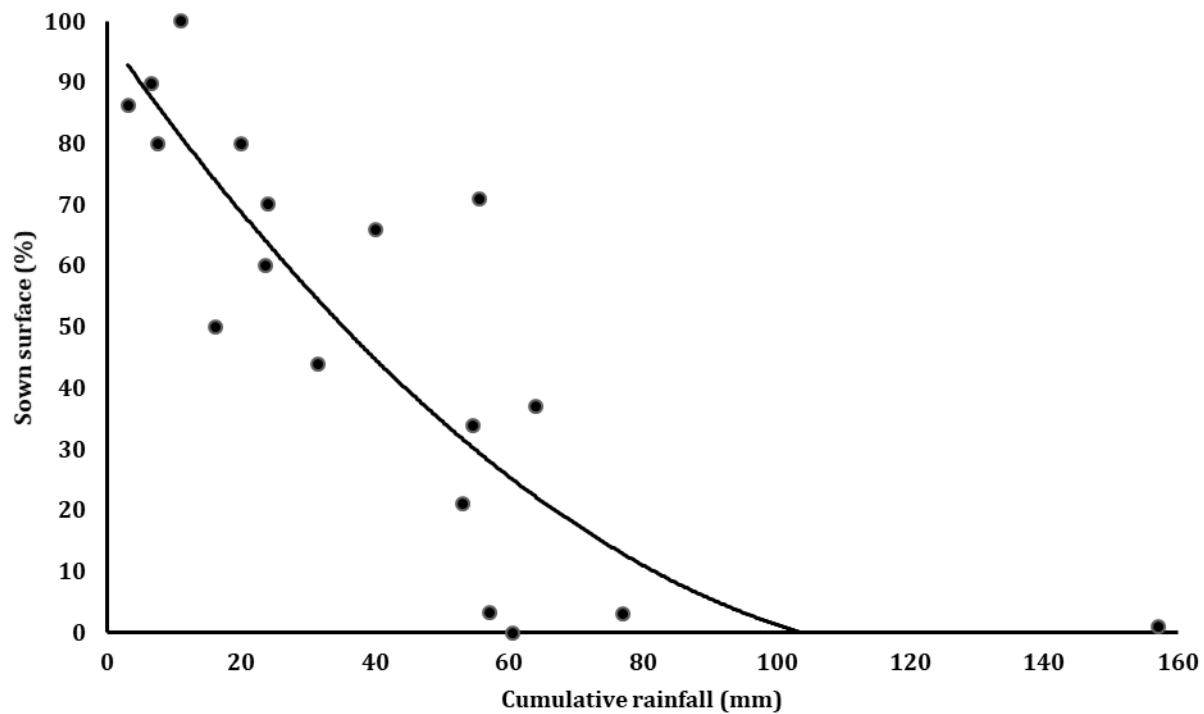

**Figure. 2.** Year-to-year emergence rate variability of sugar beet by sowing date under future climate scenario

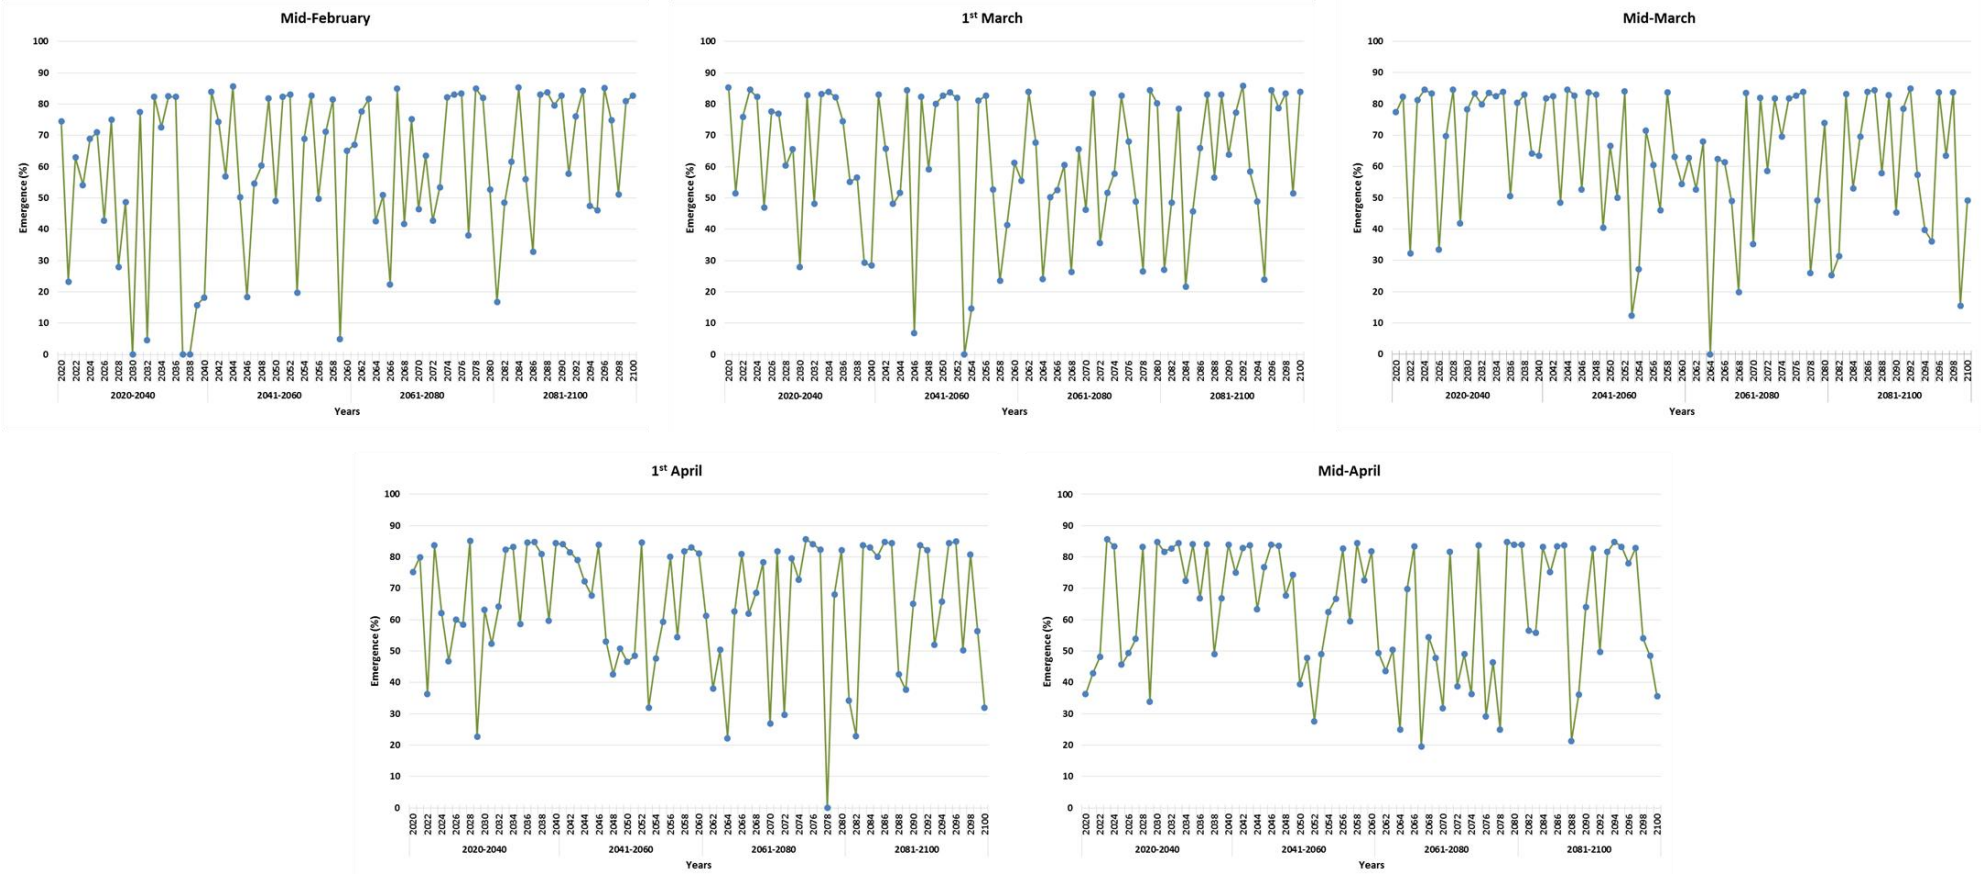



**Figure 3.** Frequencies (%) of non-emergence causes when analyzed by sowing date for each 20-year period. Only causes with a high frequency that could pose risks of crop emergence failure were considered which included frequency of non-germination >25% and frequency of seedling mortality due to clod, crust and drought, each >15%

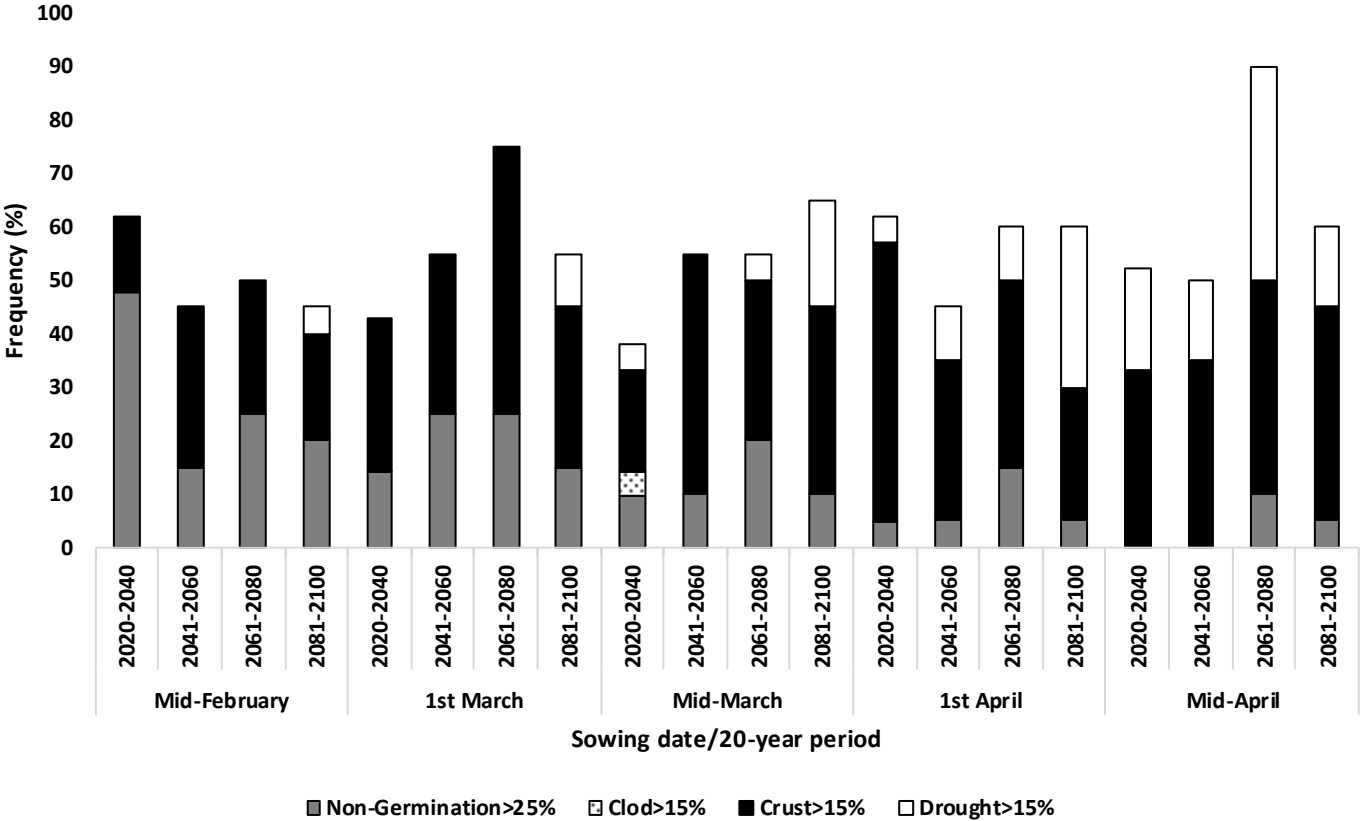

Source: https://www.biorxiv.org/content/biorxiv/early/2019/02/05/541276.full.pdf
